# Supplementary material for: Encoding of female mating dynamics by a hypothalamic line attractor
Source: PubMed Central journal article supplement (PMC11499253; doi:10.1038/s41586-024-07916-w), 2024-08-14
Supplement: 41586_2024_7916_MOESM1_ESM.pdf [file 41586_2024_7916_MOESM1_ESM.pdf]

## Reporting Summary

Nature Portfolio wishes to improve the reproducibility of the work that we publish. This form provides structure for consistency and transparency in reporting. For further information on Nature Portfolio policies, see our [Editorial Policies](#) and the [Editorial Policy Checklist](#).

### Statistics

For all statistical analyses, confirm that the following items are present in the figure legend, table legend, main text, or Methods section.

n/a | Confirmed

- The exact sample size ( $n$ ) for each experimental group/condition, given as a discrete number and unit of measurement
- A statement on whether measurements were taken from distinct samples or whether the same sample was measured repeatedly
- The statistical test(s) used AND whether they are one- or two-sided  
*Only common tests should be described solely by name; describe more complex techniques in the Methods section.*
- A description of all covariates tested
- A description of any assumptions or corrections, such as tests of normality and adjustment for multiple comparisons
- A full description of the statistical parameters including central tendency (e.g. means) or other basic estimates (e.g. regression coefficient) AND variation (e.g. standard deviation) or associated estimates of uncertainty (e.g. confidence intervals)
- For null hypothesis testing, the test statistic (e.g.  $F$ ,  $t$ ,  $r$ ) with confidence intervals, effect sizes, degrees of freedom and  $P$  value noted  
*Give  $P$  values as exact values whenever suitable.*
- For Bayesian analysis, information on the choice of priors and Markov chain Monte Carlo settings
- For hierarchical and complex designs, identification of the appropriate level for tests and full reporting of outcomes
- Estimates of effect sizes (e.g. Cohen's  $d$ , Pearson's  $r$ ), indicating how they were calculated

*Our web collection on [statistics for biologists](#) contains articles on many of the points above.*

### Software and code

Policy information about [availability of computer code](#)

Data collection

We listed all softwares used in the experiments and for analysis in the Methods section. StreamPix7 (Norpix) was used to synchronize video and neural recordings. A custom MATLAB-based behavior annotation interface was used to manually annotate behavior videos. Synapse software (Tucker Davis Technologies) was used to collect the fiberphotometry signal. FluoView (v Olympus) was used to capture Confocal images. Inscopix Data Acquisition Software (IDAS v2.0) was used to collect micro-endoscope data.

Data analysis

Inscopix Data Processing Software (IDPS v1.7) was used to for preprocessing and motion correction. Customized Python (v3.8) code was used for analyzing behavior data and fiberphotometry data. GraphPad (v8) was used to perform statistics for behavior data.

Code to analysis code for rSLDS models is available here: <https://github.com/lindermanlab/ssm>. rSLDS model weights and parameters have also been deposited in the DANDI repo with the accession number: DANDI:001097

For manuscripts utilizing custom algorithms or software that are central to the research but not yet described in published literature, software must be made available to editors and reviewers. We strongly encourage code deposition in a community repository (e.g. GitHub). See the Nature Portfolio [guidelines for submitting code & software](#) for further information.

## Data

Policy information about [availability of data](#)

All manuscripts must include a [data availability statement](#). This statement should provide the following information, where applicable:

- Accession codes, unique identifiers, or web links for publicly available datasets
- A description of any restrictions on data availability
- For clinical datasets or third party data, please ensure that the statement adheres to our [policy](#)

Data pertaining to this manuscript has been deposited in DANDI, with the following accession number: DANDI:001097

## Research involving human participants, their data, or biological material

Policy information about studies with [human participants or human data](#). See also policy information about [sex, gender \(identity/presentation\), and sexual orientation](#) and [race, ethnicity and racism](#).

|                                                                    |                                              |
|--------------------------------------------------------------------|----------------------------------------------|
| Reporting on sex and gender                                        | <input type="text" value="Not applicable."/> |
| Reporting on race, ethnicity, or other socially relevant groupings | <input type="text" value="Not applicable."/> |
| Population characteristics                                         | <input type="text" value="Not applicable."/> |
| Recruitment                                                        | <input type="text" value="Not applicable."/> |
| Ethics oversight                                                   | <input type="text" value="Not applicable."/> |

Note that full information on the approval of the study protocol must also be provided in the manuscript.

## Field-specific reporting

Please select the one below that is the best fit for your research. If you are not sure, read the appropriate sections before making your selection.

Life sciences     Behavioural & social sciences     Ecological, evolutionary & environmental sciences

For a reference copy of the document with all sections, see [nature.com/documents/nr-reporting-summary-flat.pdf](https://www.nature.com/documents/nr-reporting-summary-flat.pdf)

## Life sciences study design

All studies must disclose on these points even when the disclosure is negative.

|                 |                                                                                                                                                                                |
|-----------------|--------------------------------------------------------------------------------------------------------------------------------------------------------------------------------|
| Sample size     | <input type="text" value="We have determined that our size is sufficient to achieve the objectives of our study while maintaining statistical power and ethical standards."/>  |
| Data exclusions | <input type="text" value="We did not exclude any data."/>                                                                                                                      |
| Replication     | <input type="text" value="All experiments were conducted using 2 to 4 cohorts of animals. The results were reproducible across cohorts and combined for the final analysis."/> |
| Randomization   | <input type="text" value="This is not applicable for this study because of no data grouping."/>                                                                                |
| Blinding        | <input type="text" value="This is not applicable for this study because of no data grouping."/>                                                                                |

## Reporting for specific materials, systems and methods

We require information from authors about some types of materials, experimental systems and methods used in many studies. Here, indicate whether each material, system or method listed is relevant to your study. If you are not sure if a list item applies to your research, read the appropriate section before selecting a response.

## Materials &amp; experimental systems

| n/a                                 | Included in the study                                           |
|-------------------------------------|-----------------------------------------------------------------|
| <input checked="" type="checkbox"/> | <input type="checkbox"/> Antibodies                             |
| <input checked="" type="checkbox"/> | <input type="checkbox"/> Eukaryotic cell lines                  |
| <input checked="" type="checkbox"/> | <input type="checkbox"/> Palaeontology and archaeology          |
| <input type="checkbox"/>            | <input checked="" type="checkbox"/> Animals and other organisms |
| <input checked="" type="checkbox"/> | <input type="checkbox"/> Clinical data                          |
| <input checked="" type="checkbox"/> | <input type="checkbox"/> Dual use research of concern           |
| <input checked="" type="checkbox"/> | <input type="checkbox"/> Plants                                 |

## Methods

| n/a                                 | Included in the study                           |
|-------------------------------------|-------------------------------------------------|
| <input checked="" type="checkbox"/> | <input type="checkbox"/> ChIP-seq               |
| <input checked="" type="checkbox"/> | <input type="checkbox"/> Flow cytometry         |
| <input checked="" type="checkbox"/> | <input type="checkbox"/> MRI-based neuroimaging |

## Animals and other research organisms

Policy information about [studies involving animals](#); [ARRIVE guidelines](#) recommended for reporting animal research, and [Sex and Gender in Research](#)

|                         |                                                                                                                                                                                                                                                                                                                                                                                                                                               |
|-------------------------|-----------------------------------------------------------------------------------------------------------------------------------------------------------------------------------------------------------------------------------------------------------------------------------------------------------------------------------------------------------------------------------------------------------------------------------------------|
| Laboratory animals      | All mice used in this research aged 2-5 months. Wild type C57BL/6N mice were bred at Caltech or purchased from Charles River Laboratory. Npy2r-cre mice (Jackson Laboratory stock no. 029285) (=N1), Esr1-cre mice (Jackson Laboratory stock no. 017913), Esr1-flpo mice (Jackson Laboratory stock no. 036028) (>N10), Sf1-cre mice (Jackson Laboratory stock no. 012462) were back-crossed into the C57BL/6N background and bred at Caltech. |
| Wild animals            | The study did not involve wild animals.                                                                                                                                                                                                                                                                                                                                                                                                       |
| Reporting on sex        | Females were used as subjects.                                                                                                                                                                                                                                                                                                                                                                                                                |
| Field-collected samples | The study did not involve samples collected from the field.                                                                                                                                                                                                                                                                                                                                                                                   |
| Ethics oversight        | All experimental procedures involving the use of live mice or their tissues were carried out in accordance with NIH guidelines and approved by the Institute Animal Care and Use Committee (IACUC) and the Institute Biosafety Committee (IBC) at the California Institute of Technology (Caltech).                                                                                                                                           |

Note that full information on the approval of the study protocol must also be provided in the manuscript.

## Plants

|                       |                 |
|-----------------------|-----------------|
| Seed stocks           | Not applicable. |
| Novel plant genotypes | Not applicable. |
| Authentication        | Not applicable. |
